# Supplementary material for: High-throughput single-cell transcriptomics of bacteria using combinatorial barcoding
Source: Springer Nature journal article supplement (doi:10.1038/s41596-024-01007-w), 2024-06-17
Supplement: MOESM2 [file 41596_2024_1007_MOESM2_ESM11.xlsx]

## Sheet: Table 1 Cost Estimate Overview
Table 1: Cost Estimate of microSPLiT
*All prices listed are calculated before tax
**All prices are calaulated for the use of a 96-well plate with one sublibrary
		1 Sample	24 samples	48 samples
	Reagent Cost Per Run	710.24	1858.92	2929.26
	Consumables Cost per Run	80.54	156.23	246.6
	Barcodes Cost Per Run	20.67	20.67	20.67
	Total	790.78	2035.82	3196.53
	Start Up Costs	8142.52

## Sheet: Table 1 Reagents
Protocol Section	Reagent	Concentration	Bulk Quantity	Catalog Number	Quantity Per Run	Price (USD)	Cost Per Run 1 Sample (USD)	Cost per 24 Samples	Cost Per 48 Samples
*All prices are calaulated for the use of a full 96-well plate and one sublibrary
**All prices listed are calculated before tax
Fixation	Formaldehyde	36.5-38%	25 mL	Sigma-Aldrich, cat. no. F8775	1 mL	58.5	2.34	56.16	112.32
	PBS	1X	500 mL	Corning, cat. no. 21-040-CV	54 mL	52.5	5.67	11.34	22.68
Permeabilization	RNAse Inhibitor	40 U/ul	0.5 mL	Enzymatics, cat. no. Y9240L	73.20 uL	381	55.77	55.77	55.77
	Superase-IN	20 U/ul	10,000 U	Thermo Fisher, cat. no. AM2696	92.75 uL	485	89.96	781.33	1329.87
	Tween-20	0.1	50 mL	Sigma-Aldrich, cat. no. 655206	153.90 uL	125	0.38	9.12	18.24
	Tris pH 8.0	1M	500 mL	Thermo Fisher, cat. no. AM9856	1.8 mL	96.25	0.34	0.34	16.32
	Tris pH 7.0	1M	500 mL	Thermo Fisher, cat. no. AM9851	22 uL	91.25	0.01	0.24	0.48
	EDTA	0.5M	100 mL	Thermo Fisher, cat. no. AM9260G	5.2 mL	45.47	2.36	2.6	2.84
	Lysozyme Solution	50 mg/mL	0.5 mL	Thermo Fisher, cat. no. 90082	11 uL	65.25	1.33	31.92	63.84
PolyA Tailing	E. Coli Poly(A) Polymerase + ATP + Buffer	10X	1.5 mL	New England Biolabs Inc, cat. no. M0276L	5.5 uL	292	16.06	385.44	770.88
Reverse Transcription	dNTPs	10mM	1 mL	Thermo Fisher, R0192	132 uL	140	18.48	18.48	18.48
	Maxima H Minus Reverse Transcriptase + Buffer	200 U/mL	20,000 U	Thermo Fisher, cat. no. EP0752	121 uL	546.86	330.85	330.85	330.85
	PEG8000	0.5	100 mL	Rigaku, cat. no. 1008062	1.1 mL	65	0.61	0.61	0.61
Barcode Ligation	T4 DNA ligase + Buffer	2 million U/mL	0.05 mL	New England Biolabs Inc, cat. no. M0202M	800 uL	260	104	104	104
Lysis	NaCl	5M	100 mL	Thermo Fisher, cat. no. AM9759	24 mL	94.75	4.92	4.92	4.92
	SDS	0.1	500 mL	Thermo Fisher, cat. no. AM9822	11 mL	99	2.17	2.17	2.17
	Protienase K	20mg/mL	1 mL	Thermo Fisher, cat. no. 25530049	10 uL	182	0.36	0.36	0.36
cDNA Purification, Amplifiacation and Size Selection	C1 Dynabeads	10mg/mL	2mL	Thermo Fisher, cat. no. 65001	44 uL	590	12.98	12.98	12.98
	AEBSF	100mM	1mL	Sigma-Aldrich, cat. no. SBR00015	2.5 uL	64.5	0.16	0.16	0.16
	Kapa Hifi Hotstart Ready Mix		6.25 mL	Roche, cat. no. 7958935001	146 uL	600	26.52	26.52	26.52
	EvaGreen Dye	20X	1mL	Biotium, cat. no. 31000	5 uL	52.3	0.25	0.25	0.25
	SPRIselect beads		5mL	Beckerman Coulter, cat. no. B23318	310 uL	439.1	1.51	1.51	1.51
Fragmentation	WGS Fragmentation Mix + Buffer	5X	240 uL	Enzymatics, cat. no. Y9410L	10 uL	511	15.33	15.33	15.33
Adapter Ligation	WGS Ligase + 5X buffer		240 uL	Enzymatics, cat. no. L6030-W-L	10 uL	381	15.24	15.24	15.24
	Qbit 1X dsDNA High Sensitivity and Broad Range Assay Kit		100 assays	Thermo Fisher, cat. no. Q33230	2 assays	132	2.64	2.64	2.64
						Total	710.24	1870.28	2929.26

## Sheet: Table 1 Consumables
Item	Bulk Quantity	Catalog Number	Price (USD)	Quantity Per Run	Cost Per Run (USD)
*All prices are calaulated for the use of a 96-well plate with one sublibrary
**All prices listed are calculated before tax
96 well PCR plate, 0.1mL no skirt	10	USA Scientific, cat. no. 1402-9500	35.01	6	10.5
SealPlate Film	100	Sigma-Aldrich, cat. no Z369667	76.5	9	10.5
PluriStrainer Connector Ring	25	pluriSelect, cat. no. 41-50000-03	86	3	10.32
PluriStrainer 10 µm Cell Strainer	25	pluriSelect, cat. no. 43-50010	110	3	13.2
PluriStrainer 1 µm Cell Strainer	25	pluriSelect, cat. no. 43-50001	174	3	20.88
C-Chip Hemocytometer, Disposable Semen Test	20	INCYTO, cat. no. DHC-S02	151.39	2	15.14
Consumables Cost Per Run		80.54

## Sheet: Table 1 Barcodes
Reagent	Concentration	Catalog Number	Price (USD)	Cost Per Run (USD)
*All prices are calculated for the use of a 96-well plate with one sublibrary
**All prices listed are calculated before tax
Bardcode Plates	100uM	Custom IDT	7844.52
BC_0335	1mM	Custom IDT	17	8.42
BC_0284	1mM	Custom IDT	20	1.64
BC_0027	10uM	Custom IDT	17.4	0.12
BC_0062	10uM	Custom IDT	6.6	0.22
BC_0066	100uM	Custom IDT	30	5.54
BC_0076	10uM	Custom IDT	19.2	0.14
BC_0077	10uM	Custom IDT	19.2	0.14
BC_0078	10uM	Custom IDT	19.2	0.14
BC_0079	10uM	Custom IDT	19.2	0.14
BC_0080	10uM	Custom IDT	19.2	0.14
BC_0081	10uM	Custom IDT	19.2	0.14
BC_0082	10uM	Custom IDT	19.2	0.14
BC_0083	10uM	Custom IDT	19.2	0.14
BC_0127	100uM	Custom IDT	10	0.16
BC_0243	100uM	Custom IDT	9.9	0.27
BC_0244	100uM	Custom IDT	9.6	0.26
BC_0340	100uM	Custom IDT	17	2.69
BC_0108	10uM	Custom IDT	6.9	0.23
Barcodes Cost Per Run	20.67

## Sheet: Table 2
Table 2: Cost estimate and comparison of high-throughput bacterial scRNA-seq methods.
Method	Estimated Cost
microSPLiT	One sample (up to 45,000 cells) = $773.15; one sample (up to 1M cells) = $2,510
	Start up costs (barcodes) = $8,142.52
PETRI-seq	Cell and library preparation (~10,000 cells) = $367
	Start up costs (barcodes) = $4,593
BacDrop	Cost estimate unavailable
M3-seq	Cost estimate unavailable
MATQ-seq	Cost per library (20 cells) = $800-$1,200
ProBac-seq	Cost per sample (up to 10,000 cells) = $1,649
	Start up costs = $942.25
smRandom-seq	Cost estimate unavailable

## Sheet: Table 3 General Oligonucleotide
Table 3: Sequences of oligonucleotides and source barcode plates used in microSPLiT.
Oligonucleotide Number	Description	Sequence
BC_0027	PCR primer for sublibary amplification	AATGATACGGCGACCACCGAGATCTACACTCTTTCCCTACACGACGCTCTTCCGATCT
BC_0062	PCR primer for sublibary amplification	CAGACGTGTGCTCTTCCGATCT
BC_0108	PCR primer for sublibary amplification	AAGCAGTGGTATCAACGCAGAGT
BC_0066	Round 3 blocking strand	GTGGCCGATGTTTCGCATCGGCGTACGACT
BC_0076	PCR primer (TSBC07), sublibrary index #1 (used with BC_0027)	CAAGCAGAAGACGGCATACGAGATGATCTGGTGACTGGAGTTCAGACGTGTGCTCTTCCGATCT
BC_0077	PCR primer (TSBC08), sublibrary index #2 (used with BC_0027)	CAAGCAGAAGACGGCATACGAGATTCAAGTGTGACTGGAGTTCAGACGTGTGCTCTTCCGATCT
BC_0078	PCR primer (TSBC09), sublibrary index #3 (used with BC_0027)	CAAGCAGAAGACGGCATACGAGATCTGATCGTGACTGGAGTTCAGACGTGTGCTCTTCCGATCT
BC_0079	PCR primer (TSBC10), sublibrary index #4 (used with BC_0027)	CAAGCAGAAGACGGCATACGAGATAAGCTAGTGACTGGAGTTCAGACGTGTGCTCTTCCGATCT
BC_0080	PCR primer (TSBC11), sublibrary index #5 (used with BC_0027)	CAAGCAGAAGACGGCATACGAGATGTAGCCGTGACTGGAGTTCAGACGTGTGCTCTTCCGATCT
BC_0081	PCR primer (TSBC12), sublibrary index #6 (used with BC_0027)	CAAGCAGAAGACGGCATACGAGATTACAAGGTGACTGGAGTTCAGACGTGTGCTCTTCCGATCT
BC_0082	PCR primer (TSBC13), sublibrary index #7 (used with BC_0027)	CAAGCAGAAGACGGCATACGAGATTTGACTGTGACTGGAGTTCAGACGTGTGCTCTTCCGATCT
BC_0083	PCR primer (TSBC14), sublibrary index #8 (used with BC_0027)	CAAGCAGAAGACGGCATACGAGATGGAACTGTGACTGGAGTTCAGACGTGTGCTCTTCCGATCT
BC_0246	PCR primer (TSBC15), sublibrary index #9 (used with BC_0027)	CAAGCAGAAGACGGCATACGAGATTGACATGTGACTGGAGTTCAGACGTGTGCTCTTCCGATCT
BC_0247	PCR primer (TSBC16), sublibrary index #10 (used with BC_0027)	CAAGCAGAAGACGGCATACGAGATGGACGGGTGACTGGAGTTCAGACGTGTGCTCTTCCGATCT
BC_0248	PCR primer (TSBC17), sublibrary index #11 (used with BC_0027)	CAAGCAGAAGACGGCATACGAGATCTCTACGTGACTGGAGTTCAGACGTGTGCTCTTCCGATCT
BC_0249	PCR primer (TSBC18), sublibrary index #12 (used with BC_0027)	CAAGCAGAAGACGGCATACGAGATGCGGACGTGACTGGAGTTCAGACGTGTGCTCTTCCGATCT
BC_0250	PCR primer (TSBC19), sublibrary index #13 (used with BC_0027)	CAAGCAGAAGACGGCATACGAGATTTTCACGTGACTGGAGTTCAGACGTGTGCTCTTCCGATCT
BC_0251	PCR primer (TSBC20), sublibrary index #14 (used with BC_0027)	CAAGCAGAAGACGGCATACGAGATGGCCACGTGACTGGAGTTCAGACGTGTGCTCTTCCGATCT
BC_0252	PCR primer (TSBC21), sublibrary index #15 (used with BC_0027)	CAAGCAGAAGACGGCATACGAGATCGAAACGTGACTGGAGTTCAGACGTGTGCTCTTCCGATCT
BC_0253	PCR primer (TSBC22), sublibrary index #16 (used with BC_0027)	CAAGCAGAAGACGGCATACGAGATCGTACGGTGACTGGAGTTCAGACGTGTGCTCTTCCGATCT
BC_0254	PCR primer (TSBC23), sublibrary index #17 (used with BC_0027)	CAAGCAGAAGACGGCATACGAGATCCACTCGTGACTGGAGTTCAGACGTGTGCTCTTCCGATCT
BC_0255	PCR primer (TSBC24), sublibrary index #18 (used with BC_0027)	CAAGCAGAAGACGGCATACGAGATGCTACCGTGACTGGAGTTCAGACGTGTGCTCTTCCGATCT
BC_0256	PCR primer (TSBC25), sublibrary index #19 (used with BC_0027)	CAAGCAGAAGACGGCATACGAGATATCAGTGTGACTGGAGTTCAGACGTGTGCTCTTCCGATCT
BC_0257	PCR primer (TSBC26), sublibrary index #20 (used with BC_0027)	CAAGCAGAAGACGGCATACGAGATGCTCATGTGACTGGAGTTCAGACGTGTGCTCTTCCGATCT
BC_0258	PCR primer (TSBC27), sublibrary index #21 (used with BC_0027)	CAAGCAGAAGACGGCATACGAGATAGGAATGTGACTGGAGTTCAGACGTGTGCTCTTCCGATCT
BC_0259	PCR primer (TSBC28), sublibrary index #22 (used with BC_0027)	CAAGCAGAAGACGGCATACGAGATCTTTTGGTGACTGGAGTTCAGACGTGTGCTCTTCCGATCT
BC_0260	PCR primer (TSBC29), sublibrary index #23 (used with BC_0027)	CAAGCAGAAGACGGCATACGAGATTAGTTGGTGACTGGAGTTCAGACGTGTGCTCTTCCGATCT
BC_0261	PCR primer (TSBC30), sublibrary index #24 (used with BC_0027)	CAAGCAGAAGACGGCATACGAGATCCGGTGGTGACTGGAGTTCAGACGTGTGCTCTTCCGATCT
BC_0127	Template switching primer, RNAse-free HPLC purified	AAGCAGTGGTATCAACGCAGAGTGAATrGrG+G
BC_0243	Adaptor duplex top strand	ACACTCTTTCCCTACACGACGCTCTTCCGATCT
BC_0244	Adaptor duplex bottom strand	GATCGGAAGAGCGTCGTGTAGGGAAAGAGTGT
BC_0284	Round 3 barcode linker	TACGCCGATGCGAAACATCG
BC_0335	Round 2 barcode linker	CCACAGTCTCAAGCACG
BC_0340	Round 2 blocking strand	CGTGCTTGAGACTGTGG

## Sheet: Table 3 Round 1 PolyT Barcodes
WellPosition	Name	Sequence
A1	Round1_01	/5Phos/ACTGTGGACTCGTAATTTTTTTTTTTTTTTVN
A2	Round1_02	/5Phos/ACTGTGGAAACGATATTTTTTTTTTTTTTTVN
A3	Round1_03	/5Phos/ACTGTGGTTACCTCGTTTTTTTTTTTTTTTVN
A4	Round1_04	/5Phos/ACTGTGGGCCTGCAATTTTTTTTTTTTTTTVN
A5	Round1_05	/5Phos/ACTGTGGTGGTATACTTTTTTTTTTTTTTTVN
A6	Round1_06	/5Phos/ACTGTGGCGTTCGAGTTTTTTTTTTTTTTTVN
A7	Round1_07	/5Phos/ACTGTGGTCTATTACTTTTTTTTTTTTTTTVN
A8	Round1_08	/5Phos/ACTGTGGATAAGCTCTTTTTTTTTTTTTTTVN
A9	Round1_09	/5Phos/ACTGTGGATTCATGGTTTTTTTTTTTTTTTVN
A10	Round1_10	/5Phos/ACTGTGGATCCGCGATTTTTTTTTTTTTTTVN
A11	Round1_11	/5Phos/ACTGTGGATCGCATATTTTTTTTTTTTTTTVN
A12	Round1_12	/5Phos/ACTGTGGCCGTTCTATTTTTTTTTTTTTTTVN
B1	Round1_13	/5Phos/ACTGTGGTGGCGCGCTTTTTTTTTTTTTTTVN
B2	Round1_14	/5Phos/ACTGTGGTGTCTGAATTTTTTTTTTTTTTTVN
B3	Round1_15	/5Phos/ACTGTGGCTGTCCCGTTTTTTTTTTTTTTTVN
B4	Round1_16	/5Phos/ACTGTGGAATTTCTCTTTTTTTTTTTTTTTVN
B5	Round1_17	/5Phos/ACTGTGGCGCGACTATTTTTTTTTTTTTTTVN
B6	Round1_18	/5Phos/ACTGTGGGGGATCGGTTTTTTTTTTTTTTTVN
B7	Round1_19	/5Phos/ACTGTGGTTATTCTGTTTTTTTTTTTTTTTVN
B8	Round1_20	/5Phos/ACTGTGGAGGCGGCATTTTTTTTTTTTTTTVN
B9	Round1_21	/5Phos/ACTGTGGACGCCGGCTTTTTTTTTTTTTTTVN
B10	Round1_22	/5Phos/ACTGTGGTTGTCTTATTTTTTTTTTTTTTTVN
B11	Round1_23	/5Phos/ACTGTGGTACGGTTATTTTTTTTTTTTTTTVN
B12	Round1_24	/5Phos/ACTGTGGTTGGGAGATTTTTTTTTTTTTTTVN
C1	Round1_25	/5Phos/ACTGTGGTGCTTGGGTTTTTTTTTTTTTTTVN
C2	Round1_26	/5Phos/ACTGTGGTAAATATCTTTTTTTTTTTTTTTVN
C3	Round1_27	/5Phos/ACTGTGGCACAATTGTTTTTTTTTTTTTTTVN
C4	Round1_28	/5Phos/ACTGTGGGTGCTAGCTTTTTTTTTTTTTTTVN
C5	Round1_29	/5Phos/ACTGTGGCGCCCGGATTTTTTTTTTTTTTTVN
C6	Round1_30	/5Phos/ACTGTGGGCTCGCGGTTTTTTTTTTTTTTTVN
C7	Round1_31	/5Phos/ACTGTGGCTTTGGTCTTTTTTTTTTTTTTTVN
C8	Round1_32	/5Phos/ACTGTGGTTCCGATCTTTTTTTTTTTTTTTVN
C9	Round1_33	/5Phos/ACTGTGGTTCGCTACTTTTTTTTTTTTTTTVN
C10	Round1_34	/5Phos/ACTGTGGAGCGAAACTTTTTTTTTTTTTTTVN
C11	Round1_35	/5Phos/ACTGTGGAAATAGCATTTTTTTTTTTTTTTVN
C12	Round1_36	/5Phos/ACTGTGGCGTCTAGGTTTTTTTTTTTTTTTVN
D1	Round1_37	/5Phos/ACTGTGGGCCGTGTATTTTTTTTTTTTTTTVN
D2	Round1_38	/5Phos/ACTGTGGCGCTTAAATTTTTTTTTTTTTTTVN
D3	Round1_39	/5Phos/ACTGTGGGACCTTTCTTTTTTTTTTTTTTTVN
D4	Round1_40	/5Phos/ACTGTGGGGTGGAGCTTTTTTTTTTTTTTTVN
D5	Round1_41	/5Phos/ACTGTGGTACTCGAATTTTTTTTTTTTTTTVN
D6	Round1_42	/5Phos/ACTGTGGCATTTGGATTTTTTTTTTTTTTTVN
D7	Round1_43	/5Phos/ACTGTGGGACGGGACTTTTTTTTTTTTTTTVN
D8	Round1_44	/5Phos/ACTGTGGGTCGCGCGTTTTTTTTTTTTTTTVN
D9	Round1_45	/5Phos/ACTGTGGGTTACGTATTTTTTTTTTTTTTTVN
D10	Round1_46	/5Phos/ACTGTGGCTATTTCATTTTTTTTTTTTTTTVN
D11	Round1_47	/5Phos/ACTGTGGACTATATATTTTTTTTTTTTTTTVN
D12	Round1_48	/5Phos/ACTGTGGTCACTTTATTTTTTTTTTTTTTTVN
E1	Round1_49	/5Phos/ACTGTGGCTGCTTTGTTTTTTTTTTTTTTTVN
E2	Round1_50	/5Phos/ACTGTGGCATGATCATTTTTTTTTTTTTTTVN
E3	Round1_51	/5Phos/ACTGTGGGGGTAGCGTTTTTTTTTTTTTTTVN
E4	Round1_52	/5Phos/ACTGTGGCCGAGAAATTTTTTTTTTTTTTTVN
E5	Round1_53	/5Phos/ACTGTGGACGGACTCTTTTTTTTTTTTTTTVN
E6	Round1_54	/5Phos/ACTGTGGACTTACGATTTTTTTTTTTTTTTVN
E7	Round1_55	/5Phos/ACTGTGGTATTTAAGTTTTTTTTTTTTTTTVN
E8	Round1_56	/5Phos/ACTGTGGACCGTACGTTTTTTTTTTTTTTTVN
E9	Round1_57	/5Phos/ACTGTGGTATAGTCGTTTTTTTTTTTTTTTVN
E10	Round1_58	/5Phos/ACTGTGGTGGGCATCTTTTTTTTTTTTTTTVN
E11	Round1_59	/5Phos/ACTGTGGTACCTAGATTTTTTTTTTTTTTTVN
E12	Round1_60	/5Phos/ACTGTGGGCTGCATGTTTTTTTTTTTTTTTVN
F1	Round1_61	/5Phos/ACTGTGGGTCATATGTTTTTTTTTTTTTTTVN
F2	Round1_62	/5Phos/ACTGTGGATATTGGCTTTTTTTTTTTTTTTVN
F3	Round1_63	/5Phos/ACTGTGGCTAAGGGATTTTTTTTTTTTTTTVN
F4	Round1_64	/5Phos/ACTGTGGTCGTTTCGTTTTTTTTTTTTTTTVN
F5	Round1_65	/5Phos/ACTGTGGGAATAATGTTTTTTTTTTTTTTTVN
F6	Round1_66	/5Phos/ACTGTGGACTGCGCATTTTTTTTTTTTTTTVN
F7	Round1_67	/5Phos/ACTGTGGGCTTATAGTTTTTTTTTTTTTTTVN
F8	Round1_68	/5Phos/ACTGTGGATCATGCATTTTTTTTTTTTTTTVN
F9	Round1_69	/5Phos/ACTGTGGACGTTAACTTTTTTTTTTTTTTTVN
F10	Round1_70	/5Phos/ACTGTGGCCATCTTGTTTTTTTTTTTTTTTVN
F11	Round1_71	/5Phos/ACTGTGGCATAGCTATTTTTTTTTTTTTTTVN
F12	Round1_72	/5Phos/ACTGTGGGAGGTTGATTTTTTTTTTTTTTTVN
G1	Round1_73	/5Phos/ACTGTGGGCACTGACTTTTTTTTTTTTTTTVN
G2	Round1_74	/5Phos/ACTGTGGTTCATCGCTTTTTTTTTTTTTTTVN
G3	Round1_75	/5Phos/ACTGTGGGAAATTAGTTTTTTTTTTTTTTTVN
G4	Round1_76	/5Phos/ACTGTGGAGGATTAATTTTTTTTTTTTTTTVN
G5	Round1_77	/5Phos/ACTGTGGAATAGAACTTTTTTTTTTTTTTTVN
G6	Round1_78	/5Phos/ACTGTGGTCTTAATCTTTTTTTTTTTTTTTVN
G7	Round1_79	/5Phos/ACTGTGGTAATACGCTTTTTTTTTTTTTTTVN
G8	Round1_80	/5Phos/ACTGTGGGTTTGTGATTTTTTTTTTTTTTTVN
G9	Round1_81	/5Phos/ACTGTGGCGAACGTCTTTTTTTTTTTTTTTVN
G10	Round1_82	/5Phos/ACTGTGGGGTTCTTCTTTTTTTTTTTTTTTVN
G11	Round1_83	/5Phos/ACTGTGGGCAAATTCTTTTTTTTTTTTTTTVN
G12	Round1_84	/5Phos/ACTGTGGGCTATGCGTTTTTTTTTTTTTTTVN
H1	Round1_85	/5Phos/ACTGTGGCTACCCTATTTTTTTTTTTTTTTVN
H2	Round1_86	/5Phos/ACTGTGGGTGGGTTCTTTTTTTTTTTTTTTVN
H3	Round1_87	/5Phos/ACTGTGGGTCCGTAGTTTTTTTTTTTTTTTVN
H4	Round1_88	/5Phos/ACTGTGGTGCGATCGTTTTTTTTTTTTTTTVN
H5	Round1_89	/5Phos/ACTGTGGTATCCGGGTTTTTTTTTTTTTTTVN
H6	Round1_90	/5Phos/ACTGTGGAGGTAATATTTTTTTTTTTTTTTVN
H7	Round1_91	/5Phos/ACTGTGGCGTGGTTGTTTTTTTTTTTTTTTVN
H8	Round1_92	/5Phos/ACTGTGGGACAAAGCTTTTTTTTTTTTTTTVN
H9	Round1_93	/5Phos/ACTGTGGGGGCGATGTTTTTTTTTTTTTTTVN
H10	Round1_94	/5Phos/ACTGTGGATCTATAATTTTTTTTTTTTTTTVN
H11	Round1_95	/5Phos/ACTGTGGGCCCATGATTTTTTTTTTTTTTTVN
H12	Round1_96	/5Phos/ACTGTGGCTGAAAGGTTTTTTTTTTTTTTTVN

## Sheet: Table 3 R1 Random Hex Barcodes
WellPosition	Name	Sequence
A1	Round1_01	/5Phos/ACTGTGGACTCGTAANNNNNN
A2	Round1_02	/5Phos/ACTGTGGAAACGATANNNNNN
A3	Round1_03	/5Phos/ACTGTGGTTACCTCGNNNNNN
A4	Round1_04	/5Phos/ACTGTGGGCCTGCAANNNNNN
A5	Round1_05	/5Phos/ACTGTGGTGGTATACNNNNNN
A6	Round1_06	/5Phos/ACTGTGGCGTTCGAGNNNNNN
A7	Round1_07	/5Phos/ACTGTGGTCTATTACNNNNNN
A8	Round1_08	/5Phos/ACTGTGGATAAGCTCNNNNNN
A9	Round1_09	/5Phos/ACTGTGGATTCATGGNNNNNN
A10	Round1_10	/5Phos/ACTGTGGATCCGCGANNNNNN
A11	Round1_11	/5Phos/ACTGTGGATCGCATANNNNNN
A12	Round1_12	/5Phos/ACTGTGGCCGTTCTANNNNNN
B1	Round1_13	/5Phos/ACTGTGGTGGCGCGCNNNNNN
B2	Round1_14	/5Phos/ACTGTGGTGTCTGAANNNNNN
B3	Round1_15	/5Phos/ACTGTGGCTGTCCCGNNNNNN
B4	Round1_16	/5Phos/ACTGTGGAATTTCTCNNNNNN
B5	Round1_17	/5Phos/ACTGTGGCGCGACTANNNNNN
B6	Round1_18	/5Phos/ACTGTGGGGGATCGGNNNNNN
B7	Round1_19	/5Phos/ACTGTGGTTATTCTGNNNNNN
B8	Round1_20	/5Phos/ACTGTGGAGGCGGCANNNNNN
B9	Round1_21	/5Phos/ACTGTGGACGCCGGCNNNNNN
B10	Round1_22	/5Phos/ACTGTGGTTGTCTTANNNNNN
B11	Round1_23	/5Phos/ACTGTGGTACGGTTANNNNNN
B12	Round1_24	/5Phos/ACTGTGGTTGGGAGANNNNNN
C1	Round1_25	/5Phos/ACTGTGGTGCTTGGGNNNNNN
C2	Round1_26	/5Phos/ACTGTGGTAAATATCNNNNNN
C3	Round1_27	/5Phos/ACTGTGGCACAATTGNNNNNN
C4	Round1_28	/5Phos/ACTGTGGGTGCTAGCNNNNNN
C5	Round1_29	/5Phos/ACTGTGGCGCCCGGANNNNNN
C6	Round1_30	/5Phos/ACTGTGGGCTCGCGGNNNNNN
C7	Round1_31	/5Phos/ACTGTGGCTTTGGTCNNNNNN
C8	Round1_32	/5Phos/ACTGTGGTTCCGATCNNNNNN
C9	Round1_33	/5Phos/ACTGTGGTTCGCTACNNNNNN
C10	Round1_34	/5Phos/ACTGTGGAGCGAAACNNNNNN
C11	Round1_35	/5Phos/ACTGTGGAAATAGCANNNNNN
C12	Round1_36	/5Phos/ACTGTGGCGTCTAGGNNNNNN
D1	Round1_37	/5Phos/ACTGTGGGCCGTGTANNNNNN
D2	Round1_38	/5Phos/ACTGTGGCGCTTAAANNNNNN
D3	Round1_39	/5Phos/ACTGTGGGACCTTTCNNNNNN
D4	Round1_40	/5Phos/ACTGTGGGGTGGAGCNNNNNN
D5	Round1_41	/5Phos/ACTGTGGTACTCGAANNNNNN
D6	Round1_42	/5Phos/ACTGTGGCATTTGGANNNNNN
D7	Round1_43	/5Phos/ACTGTGGGACGGGACNNNNNN
D8	Round1_44	/5Phos/ACTGTGGGTCGCGCGNNNNNN
D9	Round1_45	/5Phos/ACTGTGGGTTACGTANNNNNN
D10	Round1_46	/5Phos/ACTGTGGCTATTTCANNNNNN
D11	Round1_47	/5Phos/ACTGTGGACTATATANNNNNN
D12	Round1_48	/5Phos/ACTGTGGTCACTTTANNNNNN
E1	Round1_49	/5Phos/ACTGTGGCTGCTTTGNNNNNN
E2	Round1_50	/5Phos/ACTGTGGCATGATCANNNNNN
E3	Round1_51	/5Phos/ACTGTGGGGGTAGCGNNNNNN
E4	Round1_52	/5Phos/ACTGTGGCCGAGAAANNNNNN
E5	Round1_53	/5Phos/ACTGTGGACGGACTCNNNNNN
E6	Round1_54	/5Phos/ACTGTGGACTTACGANNNNNN
E7	Round1_55	/5Phos/ACTGTGGTATTTAAGNNNNNN
E8	Round1_56	/5Phos/ACTGTGGACCGTACGNNNNNN
E9	Round1_57	/5Phos/ACTGTGGTATAGTCGNNNNNN
E10	Round1_58	/5Phos/ACTGTGGTGGGCATCNNNNNN
E11	Round1_59	/5Phos/ACTGTGGTACCTAGANNNNNN
E12	Round1_60	/5Phos/ACTGTGGGCTGCATGNNNNNN
F1	Round1_61	/5Phos/ACTGTGGGTCATATGNNNNNN
F2	Round1_62	/5Phos/ACTGTGGATATTGGCNNNNNN
F3	Round1_63	/5Phos/ACTGTGGCTAAGGGANNNNNN
F4	Round1_64	/5Phos/ACTGTGGTCGTTTCGNNNNNN
F5	Round1_65	/5Phos/ACTGTGGGAATAATGNNNNNN
F6	Round1_66	/5Phos/ACTGTGGACTGCGCANNNNNN
F7	Round1_67	/5Phos/ACTGTGGGCTTATAGNNNNNN
F8	Round1_68	/5Phos/ACTGTGGATCATGCANNNNNN
F9	Round1_69	/5Phos/ACTGTGGACGTTAACNNNNNN
F10	Round1_70	/5Phos/ACTGTGGCCATCTTGNNNNNN
F11	Round1_71	/5Phos/ACTGTGGCATAGCTANNNNNN
F12	Round1_72	/5Phos/ACTGTGGGAGGTTGANNNNNN
G1	Round1_73	/5Phos/ACTGTGGGCACTGACNNNNNN
G2	Round1_74	/5Phos/ACTGTGGTTCATCGCNNNNNN
G3	Round1_75	/5Phos/ACTGTGGGAAATTAGNNNNNN
G4	Round1_76	/5Phos/ACTGTGGAGGATTAANNNNNN
G5	Round1_77	/5Phos/ACTGTGGAATAGAACNNNNNN
G6	Round1_78	/5Phos/ACTGTGGTCTTAATCNNNNNN
G7	Round1_79	/5Phos/ACTGTGGTAATACGCNNNNNN
G8	Round1_80	/5Phos/ACTGTGGGTTTGTGANNNNNN
G9	Round1_81	/5Phos/ACTGTGGCGAACGTCNNNNNN
G10	Round1_82	/5Phos/ACTGTGGGGTTCTTCNNNNNN
G11	Round1_83	/5Phos/ACTGTGGGCAAATTCNNNNNN
G12	Round1_84	/5Phos/ACTGTGGGCTATGCGNNNNNN
H1	Round1_85	/5Phos/ACTGTGGCTACCCTANNNNNN
H2	Round1_86	/5Phos/ACTGTGGGTGGGTTCNNNNNN
H3	Round1_87	/5Phos/ACTGTGGGTCCGTAGNNNNNN
H4	Round1_88	/5Phos/ACTGTGGTGCGATCGNNNNNN
H5	Round1_89	/5Phos/ACTGTGGTATCCGGGNNNNNN
H6	Round1_90	/5Phos/ACTGTGGAGGTAATANNNNNN
H7	Round1_91	/5Phos/ACTGTGGCGTGGTTGNNNNNN
H8	Round1_92	/5Phos/ACTGTGGGACAAAGCNNNNNN
H9	Round1_93	/5Phos/ACTGTGGGGGCGATGNNNNNN
H10	Round1_94	/5Phos/ACTGTGGATCTATAANNNNNN
H11	Round1_95	/5Phos/ACTGTGGGCCCATGANNNNNN
H12	Round1_96	/5Phos/ACTGTGGCTGAAAGGNNNNNN

## Sheet: Table 3 R2 Ligation Barcodes
WellPosition	Name	Sequence
A1	Round2_01	/5Phos/CATCGGCGTACGACTAACGTGATATCCACGTGCTTGAG
A2	Round2_02	/5Phos/CATCGGCGTACGACTAAACATCGATCCACGTGCTTGAG
A3	Round2_03	/5Phos/CATCGGCGTACGACTATGCCTAAATCCACGTGCTTGAG
A4	Round2_04	/5Phos/CATCGGCGTACGACTAGTGGTCAATCCACGTGCTTGAG
A5	Round2_05	/5Phos/CATCGGCGTACGACTACCACTGTATCCACGTGCTTGAG
A6	Round2_06	/5Phos/CATCGGCGTACGACTACATTGGCATCCACGTGCTTGAG
A7	Round2_07	/5Phos/CATCGGCGTACGACTCAGATCTGATCCACGTGCTTGAG
A8	Round2_08	/5Phos/CATCGGCGTACGACTCATCAAGTATCCACGTGCTTGAG
A9	Round2_09	/5Phos/CATCGGCGTACGACTCGCTGATCATCCACGTGCTTGAG
A10	Round2_10	/5Phos/CATCGGCGTACGACTACAAGCTAATCCACGTGCTTGAG
A11	Round2_11	/5Phos/CATCGGCGTACGACTCTGTAGCCATCCACGTGCTTGAG
A12	Round2_12	/5Phos/CATCGGCGTACGACTAGTACAAGATCCACGTGCTTGAG
B1	Round2_13	/5Phos/CATCGGCGTACGACTAACAACCAATCCACGTGCTTGAG
B2	Round2_14	/5Phos/CATCGGCGTACGACTAACCGAGAATCCACGTGCTTGAG
B3	Round2_15	/5Phos/CATCGGCGTACGACTAACGCTTAATCCACGTGCTTGAG
B4	Round2_16	/5Phos/CATCGGCGTACGACTAAGACGGAATCCACGTGCTTGAG
B5	Round2_17	/5Phos/CATCGGCGTACGACTAAGGTACAATCCACGTGCTTGAG
B6	Round2_18	/5Phos/CATCGGCGTACGACTACACAGAAATCCACGTGCTTGAG
B7	Round2_19	/5Phos/CATCGGCGTACGACTACAGCAGAATCCACGTGCTTGAG
B8	Round2_20	/5Phos/CATCGGCGTACGACTACCTCCAAATCCACGTGCTTGAG
B9	Round2_21	/5Phos/CATCGGCGTACGACTACGCTCGAATCCACGTGCTTGAG
B10	Round2_22	/5Phos/CATCGGCGTACGACTACGTATCAATCCACGTGCTTGAG
B11	Round2_23	/5Phos/CATCGGCGTACGACTACTATGCAATCCACGTGCTTGAG
B12	Round2_24	/5Phos/CATCGGCGTACGACTAGAGTCAAATCCACGTGCTTGAG
C1	Round2_25	/5Phos/CATCGGCGTACGACTAGATCGCAATCCACGTGCTTGAG
C2	Round2_26	/5Phos/CATCGGCGTACGACTAGCAGGAAATCCACGTGCTTGAG
C3	Round2_27	/5Phos/CATCGGCGTACGACTAGTCACTAATCCACGTGCTTGAG
C4	Round2_28	/5Phos/CATCGGCGTACGACTATCCTGTAATCCACGTGCTTGAG
C5	Round2_29	/5Phos/CATCGGCGTACGACTATTGAGGAATCCACGTGCTTGAG
C6	Round2_30	/5Phos/CATCGGCGTACGACTCAACCACAATCCACGTGCTTGAG
C7	Round2_31	/5Phos/CATCGGCGTACGACTGACTAGTAATCCACGTGCTTGAG
C8	Round2_32	/5Phos/CATCGGCGTACGACTCAATGGAAATCCACGTGCTTGAG
C9	Round2_33	/5Phos/CATCGGCGTACGACTCACTTCGAATCCACGTGCTTGAG
C10	Round2_34	/5Phos/CATCGGCGTACGACTCAGCGTTAATCCACGTGCTTGAG
C11	Round2_35	/5Phos/CATCGGCGTACGACTCATACCAAATCCACGTGCTTGAG
C12	Round2_36	/5Phos/CATCGGCGTACGACTCCAGTTCAATCCACGTGCTTGAG
D1	Round2_37	/5Phos/CATCGGCGTACGACTCCGAAGTAATCCACGTGCTTGAG
D2	Round2_38	/5Phos/CATCGGCGTACGACTCCGTGAGAATCCACGTGCTTGAG
D3	Round2_39	/5Phos/CATCGGCGTACGACTCCTCCTGAATCCACGTGCTTGAG
D4	Round2_40	/5Phos/CATCGGCGTACGACTCGAACTTAATCCACGTGCTTGAG
D5	Round2_41	/5Phos/CATCGGCGTACGACTCGACTGGAATCCACGTGCTTGAG
D6	Round2_42	/5Phos/CATCGGCGTACGACTCGCATACAATCCACGTGCTTGAG
D7	Round2_43	/5Phos/CATCGGCGTACGACTCTCAATGAATCCACGTGCTTGAG
D8	Round2_44	/5Phos/CATCGGCGTACGACTCTGAGCCAATCCACGTGCTTGAG
D9	Round2_45	/5Phos/CATCGGCGTACGACTCTGGCATAATCCACGTGCTTGAG
D10	Round2_46	/5Phos/CATCGGCGTACGACTGAATCTGAATCCACGTGCTTGAG
D11	Round2_47	/5Phos/CATCGGCGTACGACTCAAGACTAATCCACGTGCTTGAG
D12	Round2_48	/5Phos/CATCGGCGTACGACTGAGCTGAAATCCACGTGCTTGAG
E1	Round2_49	/5Phos/CATCGGCGTACGACTGATAGACAATCCACGTGCTTGAG
E2	Round2_50	/5Phos/CATCGGCGTACGACTGCCACATAATCCACGTGCTTGAG
E3	Round2_51	/5Phos/CATCGGCGTACGACTGCGAGTAAATCCACGTGCTTGAG
E4	Round2_52	/5Phos/CATCGGCGTACGACTGCTAACGAATCCACGTGCTTGAG
E5	Round2_53	/5Phos/CATCGGCGTACGACTGCTCGGTAATCCACGTGCTTGAG
E6	Round2_54	/5Phos/CATCGGCGTACGACTGGAGAACAATCCACGTGCTTGAG
E7	Round2_55	/5Phos/CATCGGCGTACGACTGGTGCGAAATCCACGTGCTTGAG
E8	Round2_56	/5Phos/CATCGGCGTACGACTGTACGCAAATCCACGTGCTTGAG
E9	Round2_57	/5Phos/CATCGGCGTACGACTGTCGTAGAATCCACGTGCTTGAG
E10	Round2_58	/5Phos/CATCGGCGTACGACTGTCTGTCAATCCACGTGCTTGAG
E11	Round2_59	/5Phos/CATCGGCGTACGACTGTGTTCTAATCCACGTGCTTGAG
E12	Round2_60	/5Phos/CATCGGCGTACGACTTAGGATGAATCCACGTGCTTGAG
F1	Round2_61	/5Phos/CATCGGCGTACGACTTATCAGCAATCCACGTGCTTGAG
F2	Round2_62	/5Phos/CATCGGCGTACGACTTCCGTCTAATCCACGTGCTTGAG
F3	Round2_63	/5Phos/CATCGGCGTACGACTTCTTCACAATCCACGTGCTTGAG
F4	Round2_64	/5Phos/CATCGGCGTACGACTTGAAGAGAATCCACGTGCTTGAG
F5	Round2_65	/5Phos/CATCGGCGTACGACTTGGAACAAATCCACGTGCTTGAG
F6	Round2_66	/5Phos/CATCGGCGTACGACTTGGCTTCAATCCACGTGCTTGAG
F7	Round2_67	/5Phos/CATCGGCGTACGACTTGGTGGTAATCCACGTGCTTGAG
F8	Round2_68	/5Phos/CATCGGCGTACGACTTTCACGCAATCCACGTGCTTGAG
F9	Round2_69	/5Phos/CATCGGCGTACGACTAACTCACCATCCACGTGCTTGAG
F10	Round2_70	/5Phos/CATCGGCGTACGACTAAGAGATCATCCACGTGCTTGAG
F11	Round2_71	/5Phos/CATCGGCGTACGACTAAGGACACATCCACGTGCTTGAG
F12	Round2_72	/5Phos/CATCGGCGTACGACTAATCCGTCATCCACGTGCTTGAG
G1	Round2_73	/5Phos/CATCGGCGTACGACTAATGTTGCATCCACGTGCTTGAG
G2	Round2_74	/5Phos/CATCGGCGTACGACTACACGACCATCCACGTGCTTGAG
G3	Round2_75	/5Phos/CATCGGCGTACGACTACAGATTCATCCACGTGCTTGAG
G4	Round2_76	/5Phos/CATCGGCGTACGACTAGATGTACATCCACGTGCTTGAG
G5	Round2_77	/5Phos/CATCGGCGTACGACTAGCACCTCATCCACGTGCTTGAG
G6	Round2_78	/5Phos/CATCGGCGTACGACTAGCCATGCATCCACGTGCTTGAG
G7	Round2_79	/5Phos/CATCGGCGTACGACTAGGCTAACATCCACGTGCTTGAG
G8	Round2_80	/5Phos/CATCGGCGTACGACTATAGCGACATCCACGTGCTTGAG
G9	Round2_81	/5Phos/CATCGGCGTACGACTATCATTCCATCCACGTGCTTGAG
G10	Round2_82	/5Phos/CATCGGCGTACGACTATTGGCTCATCCACGTGCTTGAG
G11	Round2_83	/5Phos/CATCGGCGTACGACTCAAGGAGCATCCACGTGCTTGAG
G12	Round2_84	/5Phos/CATCGGCGTACGACTCACCTTACATCCACGTGCTTGAG
H1	Round2_85	/5Phos/CATCGGCGTACGACTCCATCCTCATCCACGTGCTTGAG
H2	Round2_86	/5Phos/CATCGGCGTACGACTCCGACAACATCCACGTGCTTGAG
H3	Round2_87	/5Phos/CATCGGCGTACGACTCCTAATCCATCCACGTGCTTGAG
H4	Round2_88	/5Phos/CATCGGCGTACGACTCCTCTATCATCCACGTGCTTGAG
H5	Round2_89	/5Phos/CATCGGCGTACGACTCGACACACATCCACGTGCTTGAG
H6	Round2_90	/5Phos/CATCGGCGTACGACTCGGATTGCATCCACGTGCTTGAG
H7	Round2_91	/5Phos/CATCGGCGTACGACTCTAAGGTCATCCACGTGCTTGAG
H8	Round2_92	/5Phos/CATCGGCGTACGACTGAACAGGCATCCACGTGCTTGAG
H9	Round2_93	/5Phos/CATCGGCGTACGACTGACAGTGCATCCACGTGCTTGAG
H10	Round2_94	/5Phos/CATCGGCGTACGACTGAGTTAGCATCCACGTGCTTGAG
H11	Round2_95	/5Phos/CATCGGCGTACGACTGATGAATCATCCACGTGCTTGAG
H12	Round2_96	/5Phos/CATCGGCGTACGACTGCCAAGACATCCACGTGCTTGAG

## Sheet: Table 3 R3 Ligation Barcodes
WellPosition	Name	Sequence
A1	Round3_01	/5Biosg/CAGACGTGTGCTCTTCCGATCTNNNNNNNNNNAACGTGATGTGGCCGATGTTTCG
A2	Round3_02	/5Biosg/CAGACGTGTGCTCTTCCGATCTNNNNNNNNNNAAACATCGGTGGCCGATGTTTCG
A3	Round3_03	/5Biosg/CAGACGTGTGCTCTTCCGATCTNNNNNNNNNNATGCCTAAGTGGCCGATGTTTCG
A4	Round3_04	/5Biosg/CAGACGTGTGCTCTTCCGATCTNNNNNNNNNNAGTGGTCAGTGGCCGATGTTTCG
A5	Round3_05	/5Biosg/CAGACGTGTGCTCTTCCGATCTNNNNNNNNNNACCACTGTGTGGCCGATGTTTCG
A6	Round3_06	/5Biosg/CAGACGTGTGCTCTTCCGATCTNNNNNNNNNNACATTGGCGTGGCCGATGTTTCG
A7	Round3_07	/5Biosg/CAGACGTGTGCTCTTCCGATCTNNNNNNNNNNCAGATCTGGTGGCCGATGTTTCG
A8	Round3_08	/5Biosg/CAGACGTGTGCTCTTCCGATCTNNNNNNNNNNCATCAAGTGTGGCCGATGTTTCG
A9	Round3_09	/5Biosg/CAGACGTGTGCTCTTCCGATCTNNNNNNNNNNCGCTGATCGTGGCCGATGTTTCG
A10	Round3_10	/5Biosg/CAGACGTGTGCTCTTCCGATCTNNNNNNNNNNACAAGCTAGTGGCCGATGTTTCG
A11	Round3_11	/5Biosg/CAGACGTGTGCTCTTCCGATCTNNNNNNNNNNCTGTAGCCGTGGCCGATGTTTCG
A12	Round3_12	/5Biosg/CAGACGTGTGCTCTTCCGATCTNNNNNNNNNNAGTACAAGGTGGCCGATGTTTCG
B1	Round3_13	/5Biosg/CAGACGTGTGCTCTTCCGATCTNNNNNNNNNNAACAACCAGTGGCCGATGTTTCG
B2	Round3_14	/5Biosg/CAGACGTGTGCTCTTCCGATCTNNNNNNNNNNAACCGAGAGTGGCCGATGTTTCG
B3	Round3_15	/5Biosg/CAGACGTGTGCTCTTCCGATCTNNNNNNNNNNAACGCTTAGTGGCCGATGTTTCG
B4	Round3_16	/5Biosg/CAGACGTGTGCTCTTCCGATCTNNNNNNNNNNAAGACGGAGTGGCCGATGTTTCG
B5	Round3_17	/5Biosg/CAGACGTGTGCTCTTCCGATCTNNNNNNNNNNAAGGTACAGTGGCCGATGTTTCG
B6	Round3_18	/5Biosg/CAGACGTGTGCTCTTCCGATCTNNNNNNNNNNACACAGAAGTGGCCGATGTTTCG
B7	Round3_19	/5Biosg/CAGACGTGTGCTCTTCCGATCTNNNNNNNNNNACAGCAGAGTGGCCGATGTTTCG
B8	Round3_20	/5Biosg/CAGACGTGTGCTCTTCCGATCTNNNNNNNNNNACCTCCAAGTGGCCGATGTTTCG
B9	Round3_21	/5Biosg/CAGACGTGTGCTCTTCCGATCTNNNNNNNNNNACGCTCGAGTGGCCGATGTTTCG
B10	Round3_22	/5Biosg/CAGACGTGTGCTCTTCCGATCTNNNNNNNNNNACGTATCAGTGGCCGATGTTTCG
B11	Round3_23	/5Biosg/CAGACGTGTGCTCTTCCGATCTNNNNNNNNNNACTATGCAGTGGCCGATGTTTCG
B12	Round3_24	/5Biosg/CAGACGTGTGCTCTTCCGATCTNNNNNNNNNNAGAGTCAAGTGGCCGATGTTTCG
C1	Round3_25	/5Biosg/CAGACGTGTGCTCTTCCGATCTNNNNNNNNNNAGATCGCAGTGGCCGATGTTTCG
C2	Round3_26	/5Biosg/CAGACGTGTGCTCTTCCGATCTNNNNNNNNNNAGCAGGAAGTGGCCGATGTTTCG
C3	Round3_27	/5Biosg/CAGACGTGTGCTCTTCCGATCTNNNNNNNNNNAGTCACTAGTGGCCGATGTTTCG
C4	Round3_28	/5Biosg/CAGACGTGTGCTCTTCCGATCTNNNNNNNNNNATCCTGTAGTGGCCGATGTTTCG
C5	Round3_29	/5Biosg/CAGACGTGTGCTCTTCCGATCTNNNNNNNNNNATTGAGGAGTGGCCGATGTTTCG
C6	Round3_30	/5Biosg/CAGACGTGTGCTCTTCCGATCTNNNNNNNNNNCAACCACAGTGGCCGATGTTTCG
C7	Round3_31	/5Biosg/CAGACGTGTGCTCTTCCGATCTNNNNNNNNNNGACTAGTAGTGGCCGATGTTTCG
C8	Round3_32	/5Biosg/CAGACGTGTGCTCTTCCGATCTNNNNNNNNNNCAATGGAAGTGGCCGATGTTTCG
C9	Round3_33	/5Biosg/CAGACGTGTGCTCTTCCGATCTNNNNNNNNNNCACTTCGAGTGGCCGATGTTTCG
C10	Round3_34	/5Biosg/CAGACGTGTGCTCTTCCGATCTNNNNNNNNNNCAGCGTTAGTGGCCGATGTTTCG
C11	Round3_35	/5Biosg/CAGACGTGTGCTCTTCCGATCTNNNNNNNNNNCATACCAAGTGGCCGATGTTTCG
C12	Round3_36	/5Biosg/CAGACGTGTGCTCTTCCGATCTNNNNNNNNNNCCAGTTCAGTGGCCGATGTTTCG
D1	Round3_37	/5Biosg/CAGACGTGTGCTCTTCCGATCTNNNNNNNNNNCCGAAGTAGTGGCCGATGTTTCG
D2	Round3_38	/5Biosg/CAGACGTGTGCTCTTCCGATCTNNNNNNNNNNCCGTGAGAGTGGCCGATGTTTCG
D3	Round3_39	/5Biosg/CAGACGTGTGCTCTTCCGATCTNNNNNNNNNNCCTCCTGAGTGGCCGATGTTTCG
D4	Round3_40	/5Biosg/CAGACGTGTGCTCTTCCGATCTNNNNNNNNNNCGAACTTAGTGGCCGATGTTTCG
D5	Round3_41	/5Biosg/CAGACGTGTGCTCTTCCGATCTNNNNNNNNNNCGACTGGAGTGGCCGATGTTTCG
D6	Round3_42	/5Biosg/CAGACGTGTGCTCTTCCGATCTNNNNNNNNNNCGCATACAGTGGCCGATGTTTCG
D7	Round3_43	/5Biosg/CAGACGTGTGCTCTTCCGATCTNNNNNNNNNNCTCAATGAGTGGCCGATGTTTCG
D8	Round3_44	/5Biosg/CAGACGTGTGCTCTTCCGATCTNNNNNNNNNNCTGAGCCAGTGGCCGATGTTTCG
D9	Round3_45	/5Biosg/CAGACGTGTGCTCTTCCGATCTNNNNNNNNNNCTGGCATAGTGGCCGATGTTTCG
D10	Round3_46	/5Biosg/CAGACGTGTGCTCTTCCGATCTNNNNNNNNNNGAATCTGAGTGGCCGATGTTTCG
D11	Round3_47	/5Biosg/CAGACGTGTGCTCTTCCGATCTNNNNNNNNNNCAAGACTAGTGGCCGATGTTTCG
D12	Round3_48	/5Biosg/CAGACGTGTGCTCTTCCGATCTNNNNNNNNNNGAGCTGAAGTGGCCGATGTTTCG
E1	Round3_49	/5Biosg/CAGACGTGTGCTCTTCCGATCTNNNNNNNNNNGATAGACAGTGGCCGATGTTTCG
E2	Round3_50	/5Biosg/CAGACGTGTGCTCTTCCGATCTNNNNNNNNNNGCCACATAGTGGCCGATGTTTCG
E3	Round3_51	/5Biosg/CAGACGTGTGCTCTTCCGATCTNNNNNNNNNNGCGAGTAAGTGGCCGATGTTTCG
E4	Round3_52	/5Biosg/CAGACGTGTGCTCTTCCGATCTNNNNNNNNNNGCTAACGAGTGGCCGATGTTTCG
E5	Round3_53	/5Biosg/CAGACGTGTGCTCTTCCGATCTNNNNNNNNNNGCTCGGTAGTGGCCGATGTTTCG
E6	Round3_54	/5Biosg/CAGACGTGTGCTCTTCCGATCTNNNNNNNNNNGGAGAACAGTGGCCGATGTTTCG
E7	Round3_55	/5Biosg/CAGACGTGTGCTCTTCCGATCTNNNNNNNNNNGGTGCGAAGTGGCCGATGTTTCG
E8	Round3_56	/5Biosg/CAGACGTGTGCTCTTCCGATCTNNNNNNNNNNGTACGCAAGTGGCCGATGTTTCG
E9	Round3_57	/5Biosg/CAGACGTGTGCTCTTCCGATCTNNNNNNNNNNGTCGTAGAGTGGCCGATGTTTCG
E10	Round3_58	/5Biosg/CAGACGTGTGCTCTTCCGATCTNNNNNNNNNNGTCTGTCAGTGGCCGATGTTTCG
E11	Round3_59	/5Biosg/CAGACGTGTGCTCTTCCGATCTNNNNNNNNNNGTGTTCTAGTGGCCGATGTTTCG
E12	Round3_60	/5Biosg/CAGACGTGTGCTCTTCCGATCTNNNNNNNNNNTAGGATGAGTGGCCGATGTTTCG
F1	Round3_61	/5Biosg/CAGACGTGTGCTCTTCCGATCTNNNNNNNNNNTATCAGCAGTGGCCGATGTTTCG
F2	Round3_62	/5Biosg/CAGACGTGTGCTCTTCCGATCTNNNNNNNNNNTCCGTCTAGTGGCCGATGTTTCG
F3	Round3_63	/5Biosg/CAGACGTGTGCTCTTCCGATCTNNNNNNNNNNTCTTCACAGTGGCCGATGTTTCG
F4	Round3_64	/5Biosg/CAGACGTGTGCTCTTCCGATCTNNNNNNNNNNTGAAGAGAGTGGCCGATGTTTCG
F5	Round3_65	/5Biosg/CAGACGTGTGCTCTTCCGATCTNNNNNNNNNNTGGAACAAGTGGCCGATGTTTCG
F6	Round3_66	/5Biosg/CAGACGTGTGCTCTTCCGATCTNNNNNNNNNNTGGCTTCAGTGGCCGATGTTTCG
F7	Round3_67	/5Biosg/CAGACGTGTGCTCTTCCGATCTNNNNNNNNNNTGGTGGTAGTGGCCGATGTTTCG
F8	Round3_68	/5Biosg/CAGACGTGTGCTCTTCCGATCTNNNNNNNNNNTTCACGCAGTGGCCGATGTTTCG
F9	Round3_69	/5Biosg/CAGACGTGTGCTCTTCCGATCTNNNNNNNNNNAACTCACCGTGGCCGATGTTTCG
F10	Round3_70	/5Biosg/CAGACGTGTGCTCTTCCGATCTNNNNNNNNNNAAGAGATCGTGGCCGATGTTTCG
F11	Round3_71	/5Biosg/CAGACGTGTGCTCTTCCGATCTNNNNNNNNNNAAGGACACGTGGCCGATGTTTCG
F12	Round3_72	/5Biosg/CAGACGTGTGCTCTTCCGATCTNNNNNNNNNNAATCCGTCGTGGCCGATGTTTCG
G1	Round3_73	/5Biosg/CAGACGTGTGCTCTTCCGATCTNNNNNNNNNNAATGTTGCGTGGCCGATGTTTCG
G2	Round3_74	/5Biosg/CAGACGTGTGCTCTTCCGATCTNNNNNNNNNNACACGACCGTGGCCGATGTTTCG
G3	Round3_75	/5Biosg/CAGACGTGTGCTCTTCCGATCTNNNNNNNNNNACAGATTCGTGGCCGATGTTTCG
G4	Round3_76	/5Biosg/CAGACGTGTGCTCTTCCGATCTNNNNNNNNNNAGATGTACGTGGCCGATGTTTCG
G5	Round3_77	/5Biosg/CAGACGTGTGCTCTTCCGATCTNNNNNNNNNNAGCACCTCGTGGCCGATGTTTCG
G6	Round3_78	/5Biosg/CAGACGTGTGCTCTTCCGATCTNNNNNNNNNNAGCCATGCGTGGCCGATGTTTCG
G7	Round3_79	/5Biosg/CAGACGTGTGCTCTTCCGATCTNNNNNNNNNNAGGCTAACGTGGCCGATGTTTCG
G8	Round3_80	/5Biosg/CAGACGTGTGCTCTTCCGATCTNNNNNNNNNNATAGCGACGTGGCCGATGTTTCG
G9	Round3_81	/5Biosg/CAGACGTGTGCTCTTCCGATCTNNNNNNNNNNATCATTCCGTGGCCGATGTTTCG
G10	Round3_82	/5Biosg/CAGACGTGTGCTCTTCCGATCTNNNNNNNNNNATTGGCTCGTGGCCGATGTTTCG
G11	Round3_83	/5Biosg/CAGACGTGTGCTCTTCCGATCTNNNNNNNNNNCAAGGAGCGTGGCCGATGTTTCG
G12	Round3_84	/5Biosg/CAGACGTGTGCTCTTCCGATCTNNNNNNNNNNCACCTTACGTGGCCGATGTTTCG
H1	Round3_85	/5Biosg/CAGACGTGTGCTCTTCCGATCTNNNNNNNNNNCCATCCTCGTGGCCGATGTTTCG
H2	Round3_86	/5Biosg/CAGACGTGTGCTCTTCCGATCTNNNNNNNNNNCCGACAACGTGGCCGATGTTTCG
H3	Round3_87	/5Biosg/CAGACGTGTGCTCTTCCGATCTNNNNNNNNNNCCTAATCCGTGGCCGATGTTTCG
H4	Round3_88	/5Biosg/CAGACGTGTGCTCTTCCGATCTNNNNNNNNNNCCTCTATCGTGGCCGATGTTTCG
H5	Round3_89	/5Biosg/CAGACGTGTGCTCTTCCGATCTNNNNNNNNNNCGACACACGTGGCCGATGTTTCG
H6	Round3_90	/5Biosg/CAGACGTGTGCTCTTCCGATCTNNNNNNNNNNCGGATTGCGTGGCCGATGTTTCG
H7	Round3_91	/5Biosg/CAGACGTGTGCTCTTCCGATCTNNNNNNNNNNCTAAGGTCGTGGCCGATGTTTCG
H8	Round3_92	/5Biosg/CAGACGTGTGCTCTTCCGATCTNNNNNNNNNNGAACAGGCGTGGCCGATGTTTCG
H9	Round3_93	/5Biosg/CAGACGTGTGCTCTTCCGATCTNNNNNNNNNNGACAGTGCGTGGCCGATGTTTCG
H10	Round3_94	/5Biosg/CAGACGTGTGCTCTTCCGATCTNNNNNNNNNNGAGTTAGCGTGGCCGATGTTTCG
H11	Round3_95	/5Biosg/CAGACGTGTGCTCTTCCGATCTNNNNNNNNNNGATGAATCGTGGCCGATGTTTCG
H12	Round3_96	/5Biosg/CAGACGTGTGCTCTTCCGATCTNNNNNNNNNNGCCAAGACGTGGCCGATGTTTCG

[truncated: 2 more sheets: Table 4 barcodes_r1_solo, Table 4 barcodes_r2_r3_solo]
